# Supplementary material for: Long-term biochemical progression-free survival following brachytherapy for prostate cancer: Further insight into the role of short-term androgen deprivation and intermediate risk group subclassification
Source: PubMed Central journal article supplement (PMC6474628; doi:10.1371/journal.pone.0215582), 2019-04-19

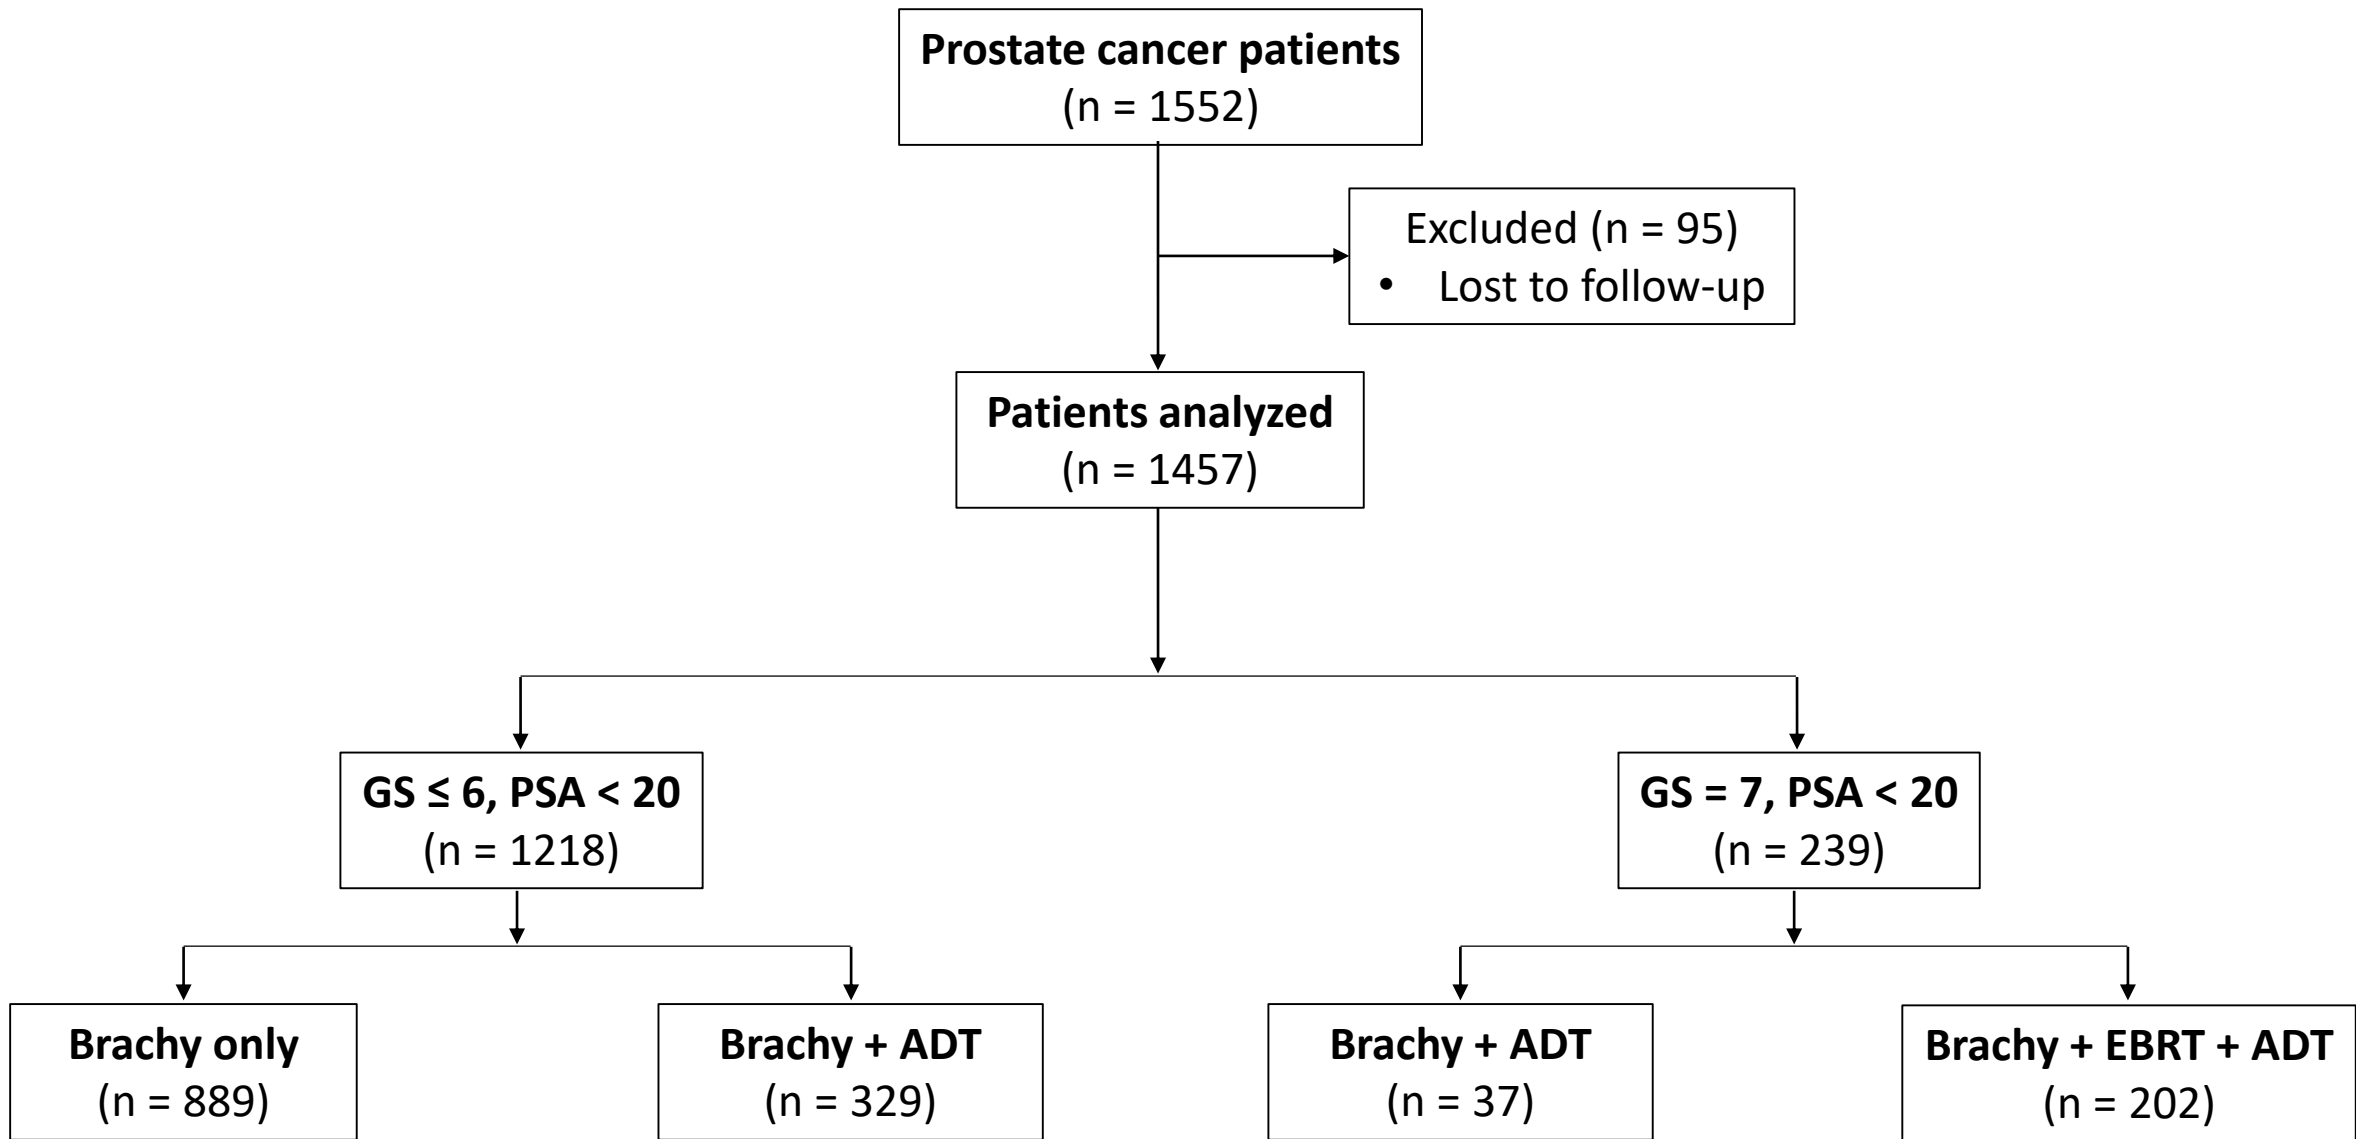

Supplement: pone.0215582.s001.pdf [file pone.0215582.s001.pdf]
